# Supplementary material
Source: ML conference proceedings conference paper supplement (https://www.ecva.net/papers/eccv_2020/papers_ECCV/html/123640171_ECCV_2020_paper.php)
Supplement: Supplementary file 1 [file 123640171-supp.pdf]

# Iterative Feature Transformation for Fast and Versatile Universal Style Transfer

Tai-Yin Chiu and Danna Gurari

University of Texas at Austin

This document supplements Sections 3 and 4 of the main paper. In particular, it includes the following:

- Derivation of the analytical gradient (supplements **Section 3.2**).
- Training details of the autoencoders (supplements **Section 4**).
- Stylized results for quantitative analysis of photo-realistic transfer (supplements **Section 4.2**).
- Formulation of NST and WCT for multi-style transfer and double-style transfer results from AdaIN and Avatar-net (supplements **Section 4.3**).

## 1 Derivation of the analytical gradient

For simplicity, we suppress the subscript  $N$ . Here we show that if

$$l_j(\mathbf{F}) = \|\mathbf{F} - \mathbf{F}^{(j)}\|_F^2 + \lambda \left\| \frac{1}{n} \mathbf{F} \mathbf{F}^T - \frac{1}{m} \mathbf{F}_s \mathbf{F}_s^T \right\|_F^2, \quad (1)$$

then

$$\frac{dl}{d\mathbf{F}} = 2(\mathbf{F} - \mathbf{F}^{(j)}) + \frac{4\lambda}{n} \left( \frac{1}{n} \mathbf{F} \mathbf{F}^T - \frac{1}{m} \mathbf{F}_s \mathbf{F}_s^T \right) \mathbf{F}. \quad (2)$$

*Proof.*

$$\|\mathbf{F} - \mathbf{F}^{(j)}\|_F^2 \quad (3)$$

$$= \text{tr}[(\mathbf{F} - \mathbf{F}^{(j)})(\mathbf{F} - \mathbf{F}^{(j)})^T] \quad (4)$$

$$= \text{tr}[\mathbf{F} \mathbf{F}^T - 2\mathbf{F}(\mathbf{F}^{(j)})^T + \mathbf{F}^{(j)}(\mathbf{F}^{(j)})^T], \quad (5)$$

and

$$\left\| \frac{1}{n} \mathbf{F} \mathbf{F}^T - \frac{1}{m} \mathbf{F}_s \mathbf{F}_s^T \right\|_F^2 \quad (6)$$

$$= \text{tr} \left[ \left( \frac{1}{n} \mathbf{F} \mathbf{F}^T - \frac{1}{m} \mathbf{F}_s \mathbf{F}_s^T \right) \left( \frac{1}{n} \mathbf{F} \mathbf{F}^T - \frac{1}{m} \mathbf{F}_s \mathbf{F}_s^T \right)^T \right] \quad (7)$$

$$= \text{tr} \left[ \frac{1}{n^2} \mathbf{F} \mathbf{F}^T \mathbf{F} \mathbf{F}^T - \frac{2}{nm} \mathbf{F} \mathbf{F}^T \mathbf{F}_s \mathbf{F}_s^T + \frac{1}{m^2} \mathbf{F}_s \mathbf{F}_s^T \mathbf{F}_s \mathbf{F}_s^T \right]. \quad (8)$$

Let  $\mathbf{F} = [f_1, f_2, \dots, f_n]$ ,  $\mathbf{F}^{(j)} = [f_1^{(j)}, f_2^{(j)}, \dots, f_n^{(j)}]$ , and  $\mathbf{F}_s = [f_1^s, f_2^s, \dots, f_m^s]$ . We first find the partial derivatives with respect to  $f_i$ :

$$\frac{\partial \|\mathbf{F} - \mathbf{F}^{(j)}\|_F^2}{\partial f_i} = \frac{\partial \text{tr}[\mathbf{F} \mathbf{F}^T]}{\partial f_i} - 2 \frac{\partial \text{tr}[\mathbf{F}(\mathbf{F}^{(j)})^T]}{\partial f_i}, \quad (9)$$

$$\frac{\partial \|\frac{1}{n}\mathbf{F}\mathbf{F}^T - \frac{1}{m}\mathbf{F}_s\mathbf{F}_s^T\|_F^2}{\partial f_i} = \frac{1}{n^2} \frac{\partial \text{tr}[\mathbf{F}\mathbf{F}^T\mathbf{F}\mathbf{F}^T]}{\partial f_i} - \frac{2}{nm} \frac{\partial \text{tr}[\mathbf{F}\mathbf{F}^T\mathbf{F}_s\mathbf{F}_s^T]}{\partial f_i}, \quad (10)$$

where  $\text{tr}[\mathbf{F}\mathbf{F}^T] = \sum_{a=1}^n f_a^T f_a$ ,  $\text{tr}[\mathbf{F}(\mathbf{F}^{(j)})^T] = \sum_{a=1}^n f_a^T f_a^{(j)}$ ,

$$\text{tr}[\mathbf{F}\mathbf{F}^T\mathbf{F}\mathbf{F}^T] \quad (11)$$

$$= \text{tr}\left[\sum_{a=1}^n f_a f_a^T \sum_{b=1}^n f_b f_b^T\right] \quad (12)$$

$$= \sum_{a=1}^n \sum_{b=1}^n \text{tr}[f_a f_a^T f_b f_b^T] \quad (13)$$

$$= \sum_{a=1}^n \sum_{b=1}^n (f_a^T f_b)^2, \quad (14)$$

and similar to  $\text{tr}[\mathbf{F}\mathbf{F}^T\mathbf{F}\mathbf{F}^T]$ , we have  $\text{tr}[\mathbf{F}\mathbf{F}^T\mathbf{F}_s\mathbf{F}_s^T] = \sum_{a=1}^n \sum_{b=1}^m (f_a^T f_b^s)^2$ .

For the partial derivatives with respect to  $f_i$ , we only have to focus on the terms associated with  $f_i$ . Therefore,

$$\frac{\partial \text{tr}[\mathbf{F}\mathbf{F}^T]}{\partial f_i} = \frac{\partial f_i^T f_i}{\partial f_i} = 2f_i, \quad (15)$$

$$\frac{\partial \text{tr}[\mathbf{F}(\mathbf{F}^{(j)})^T]}{\partial f_i} = \frac{\partial f_i^T f_i^{(j)}}{\partial f_i} = f_i^{(j)}, \quad (16)$$

$$\frac{\partial \text{tr}[\mathbf{F}\mathbf{F}^T\mathbf{F}\mathbf{F}^T]}{\partial f_i} \quad (17)$$

$$= \frac{\partial}{\partial f_i} \left( \sum_{a \neq i} (f_a^T f_i)^2 + \sum_{b \neq i} (f_i^T f_b)^2 + (f_i^T f_i)^2 \right) \quad (18)$$

$$= 2 \sum_{a \neq i} (f_a^T f_i) f_a + 2 \sum_{b \neq i} (f_i^T f_b) f_b + 4(f_i^T f_i) f_i \quad (19)$$

$$= 4 \sum_{a \neq i} (f_a^T f_i) f_a + 4(f_i^T f_i) f_i \quad (20)$$

$$= 4 \sum_{a=1}^n (f_a^T f_i) f_a \quad (21)$$

$$= 4\mathbf{F}\mathbf{F}^T f_i, \quad (22)$$

and

$$\frac{\partial \text{tr}[\mathbf{F}\mathbf{F}^T\mathbf{F}_s\mathbf{F}_s^T]}{\partial f_i} = \frac{\partial}{\partial f_i} \sum_{b=1}^m (f_i^T f_b^s)^2 = 2 \sum_{b=1}^m (f_i^T f_b^s) f_b^s = 2 \sum_{b=1}^n ((f_b^s)^T f_i) f_b^s = 2\mathbf{F}_s\mathbf{F}_s^T f_i. \quad (23)$$

Putting everything together, we have

$$\frac{\partial l_j(\mathbf{F})}{\partial f_i} = 2f_i - 2f_i^{(j)} + \lambda(4\frac{1}{n^2}\mathbf{F}\mathbf{F}^T f_i - 4\frac{1}{nm}\mathbf{F}_s\mathbf{F}_s^T f_i) \quad (24)$$

$$= 2(f_i - f_i^{(j)}) + \frac{4\lambda}{n}(\frac{1}{n}\mathbf{F}\mathbf{F}^T - \frac{1}{m}\mathbf{F}_s\mathbf{F}_s^T)f_i. \quad (25)$$

Finally,

$$\frac{dl_j(\mathbf{F})}{d\mathbf{F}} = \left[ \frac{\partial l_j}{\partial f_1}, \frac{\partial l_j}{\partial f_2}, \dots, \frac{\partial l_j}{\partial f_n} \right] \quad (26)$$

$$= 2(\mathbf{F} - \mathbf{F}^{(j)}) + \frac{4\lambda}{n}(\frac{1}{n}\mathbf{F}\mathbf{F}^T - \frac{1}{m}\mathbf{F}_s\mathbf{F}_s^T)\mathbf{F}. \quad (27)$$

## 2 Multiple-style transfer

Starting from equation 8 in the main paper:

$$\min_{\mathbf{F}_N} \|\mathbf{F}_N - \mathbf{F}_N^{(j)}\|_F^2 + \sum_{k=1}^q \lambda_N^k \left\| \frac{1}{n_N} \mathbf{F}_N \mathbf{F}_N^T - \frac{1}{m_N^k} \mathbf{F}_{N,s}^k (\mathbf{F}_{N,s}^k)^T \right\|_F^2, \quad (28)$$

since the following equivalence

$$\min_{\mathbf{X}} a\|\mathbf{X} - \mathbf{Y}\|_F^2 + b\|\mathbf{X} - \mathbf{Z}\|_F^2 \equiv \min_{\mathbf{X}} (a+b)\left\| \mathbf{X} - \frac{a}{a+b}\mathbf{Y} - \frac{b}{a+b}\mathbf{Z} \right\|_F^2 \quad (29)$$

holds, which can be shown by completing the square and removing the constant parts, we can rewrite equation 28 into an equivalent form with  $\lambda_N \triangleq \sum_{k=1}^q \lambda_N^k$ :

$$\min_{\mathbf{F}_N} \|\mathbf{F}_N - \mathbf{F}_N^{(j)}\|_F^2 + \lambda_N \left\| \frac{1}{n_N} \mathbf{F}_N \mathbf{F}_N^T - \frac{1}{\lambda_N} \sum_{k=1}^q \frac{\lambda_N^k}{m_N^k} \mathbf{F}_{N,s}^k (\mathbf{F}_{N,s}^k)^T \right\|_F^2. \quad (30)$$

The gradient of objective is then given by

$$\frac{dl_j}{d\mathbf{F}_N} = 2(\mathbf{F}_N - \mathbf{F}_N^{(j)}) + \frac{4\lambda_N}{n_N} \left( \frac{1}{n_N} \mathbf{F}_N \mathbf{F}_N^T - \frac{1}{\lambda_N} \sum_{k=1}^q \frac{\lambda_N^k}{m_N^k} \mathbf{F}_{N,s}^k (\mathbf{F}_{N,s}^k)^T \right) \mathbf{F}_N. \quad (31)$$

Note that when  $q = 1$ , equation 31 reduces to equation 2.

## 3 Training details of the autoencoders

The four autoencoders are trained by minimizing an image reconstruction loss and a perceptual loss. In particular, if the functions of the *encoder*<sub>N</sub> and *decoder*<sub>N</sub> are denoted  $\phi_N(\cdot)$  and  $\psi_N(\cdot)$ , respectively, the *decoder*<sub>N</sub> is trained by minimizing the loss  $\mathcal{L}_{AE}$ :

$$\mathcal{L}_{AE} = \|\psi_N(\phi_N(I)) - I\|_F^2 + \|\phi_N(\psi_N(\phi_N(I))) - \phi_N(I)\|_F^2, \quad (32)$$

where  $I$  is an input image. We train the autoencoders on the MS-COCO dataset. To support batch training, each image from the dataset is resized to  $512 \times 512$  and randomly cropped to  $256 \times 256$  as a training example in a batch. For the autoencoders associated with *relu4\_1* and *relu3\_1* layers, they are trained with a batch size of 8 for 5 epochs, while for *relu2\_1* and *relu1\_1* cases, the autoencoders are trained for 3 epochs, due to their smaller sizes. We use Adam optimizer with the learning rate  $1 \times 10^{-4}$  and without weight decay. Moreover, we use up-sampling layers with bilinear interpolation in the decoders as the symmetric part of the max-pooling layers in the encoders.



#### 4 Stylized results for quantitative analysis of photo-realistic transfer

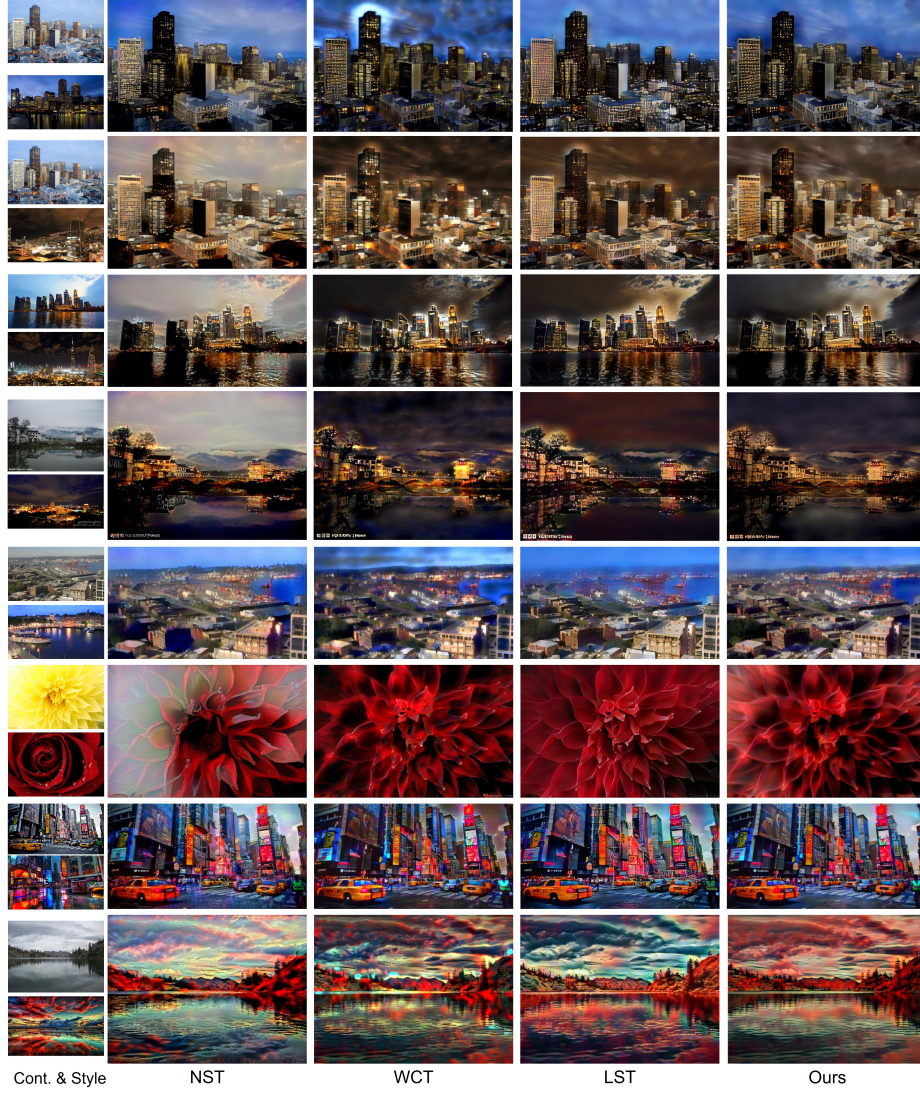

**Fig. 1:** Photo-realistically stylized images from 30 pairs of a content and a style images for quantitative analysis. No spatial control and no post-processing are applied (Part 1/4).

**Table 1:** Speed performance of our method under  $n_{upd} = 15$  and  $n_{iter} = 1$  for generating the results in figures 1, 2, 3, and 4. **Unit:** Second.

|      | $256 \times 256$ | $512 \times 512$ | $768 \times 768$ | $1024 \times 1024$ |
|------|------------------|------------------|------------------|--------------------|
| time | 0.13             | 0.31             | 0.62             | 0.92               |

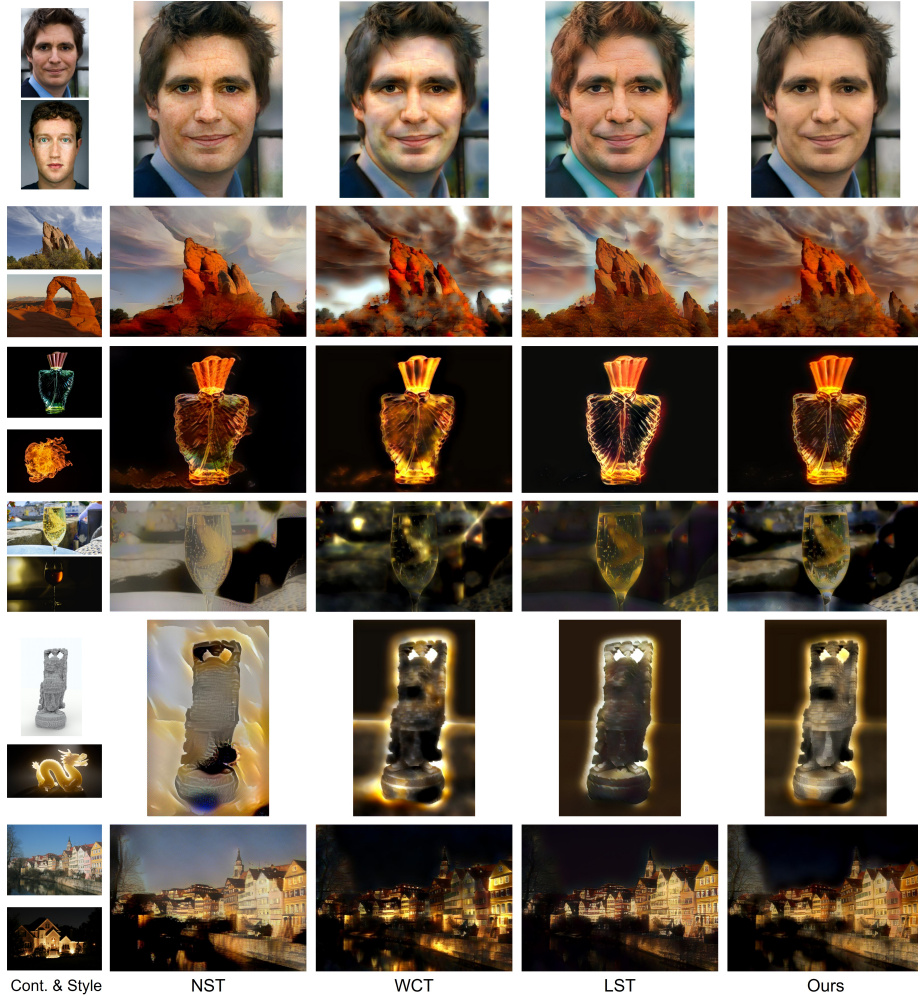

**Fig. 2:** Photo-realistically stylized images from 30 pairs of a content and a style images for quantitative analysis. No spatial control and no post-processing are applied (Part 2/4).



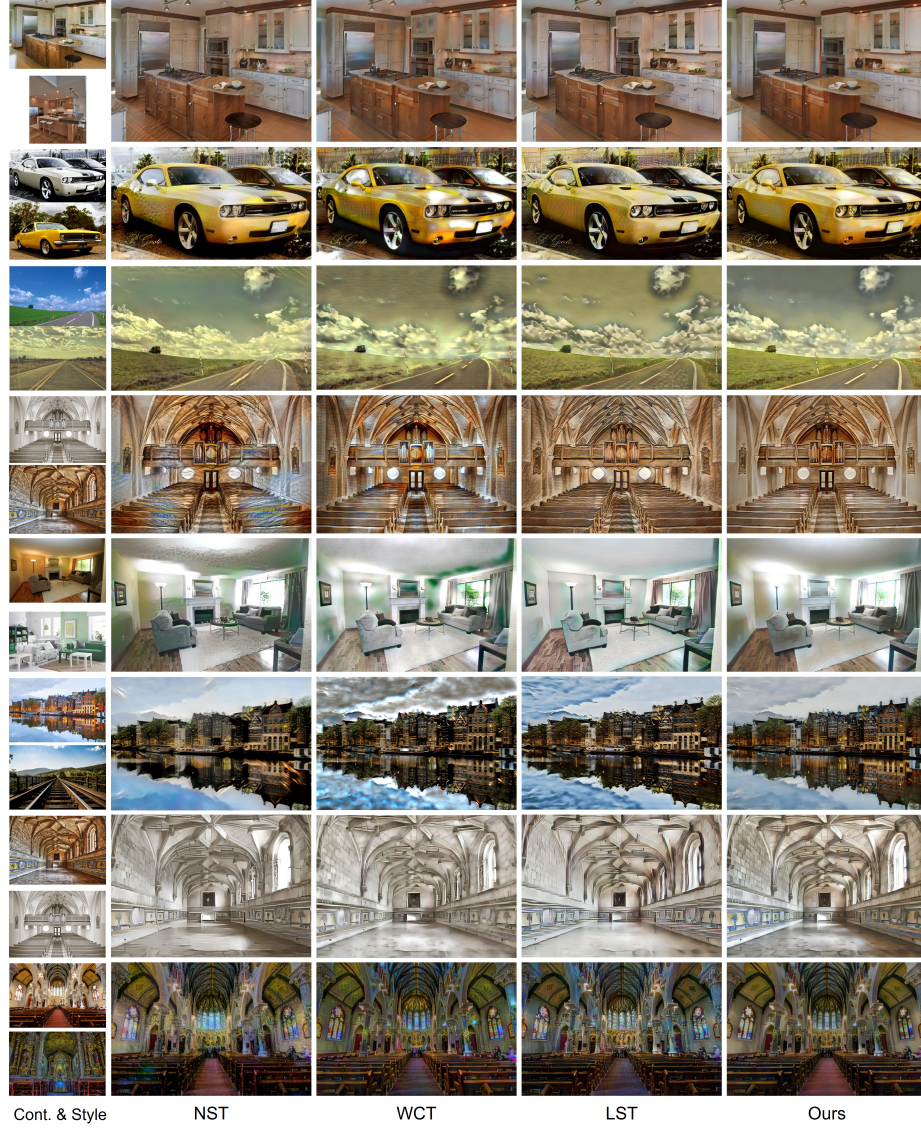

**Fig. 3:** Photo-realistically stylized images from 30 pairs of a content and a style images for quantitative analysis. No spatial control and no post-processing are applied (Part 3/4).

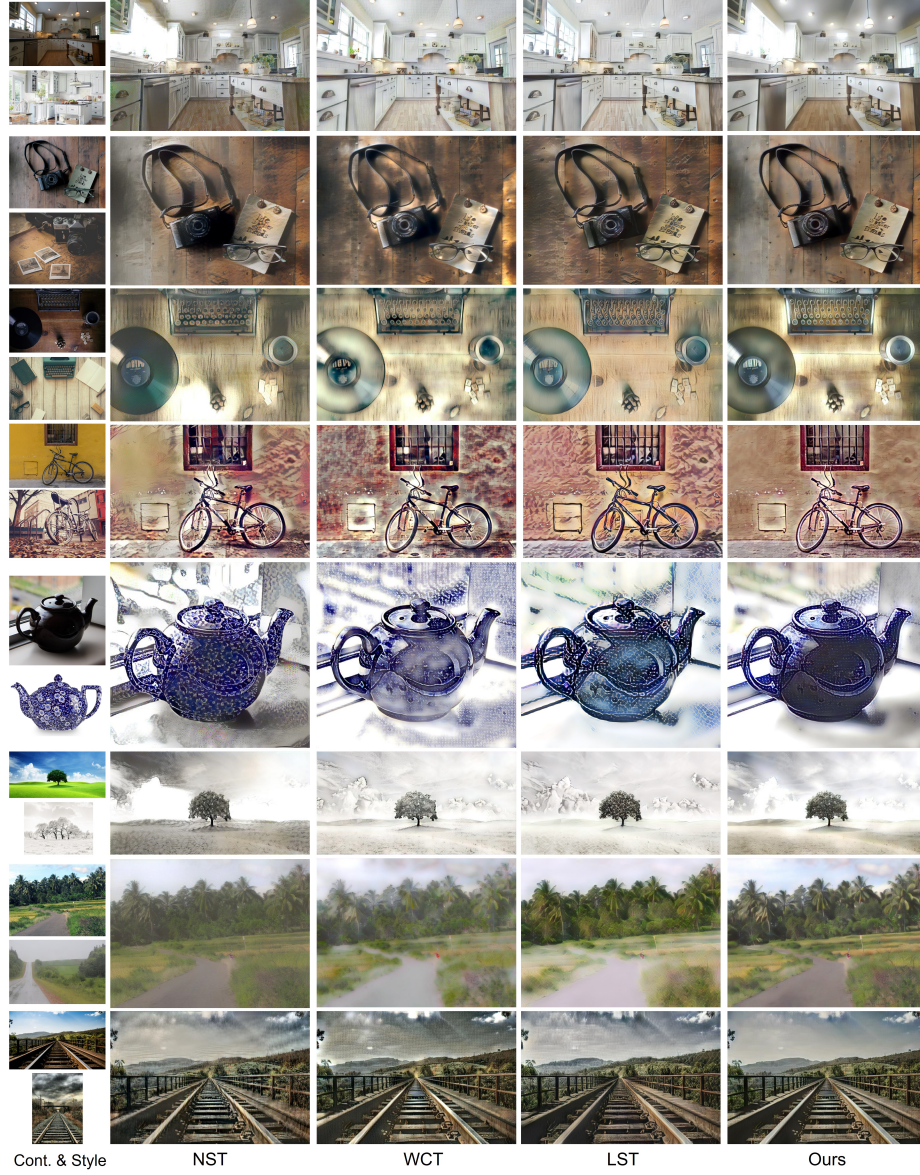

**Fig. 4:** Photo-realistically stylized images from 30 pairs of a content and a style images for quantitative analysis. No spatial control and no post-processing are applied (Part 4/4).



## 5 Formulation of NST and WCT for multi-style transfer

The objective of NST for multi-style transfer is as follows:

$$\min_I \|\mathbf{F}_4(I) - \mathbf{F}_{4,c}\|_F^2 + \sum_{N=1}^4 \sum_{k=1}^q \lambda_N^k \left\| \frac{1}{n_N} \mathbf{F}_N(I) \mathbf{F}_N(I)^T - \frac{1}{m_N^k} \mathbf{F}_{N,s}^k (\mathbf{F}_{N,s}^k)^T \right\|_F^2, \quad (33)$$

where  $\mathbf{F}_{N,s}^k$ 's are the feature maps of  $q$  style images extracted from *encoder<sub>N</sub>*. The stylized image is then derived by solving equation 33 using gradient descent by back-propagation. How different style features are included in equation 33 is non-linear.

On the other hand, WCT realizes multiple-style transfer by linear interpolation of transformed features. By applying WCT to each style feature  $\mathbf{F}_{N,s}^k$  and the content feature  $\mathbf{F}_{N,c}$ , we can derive a transformed feature  $\mathbf{F}_{N,wct}^k$ . The final feature  $\mathbf{F}_{N,wct}$  to be decoded is an affine combination:

$$\mathbf{F}_{N,wct} = \sum_{k=1}^q w_k \mathbf{F}_{N,wct}^k, \text{ with } \sum_{k=1}^q w_k = 1. \quad (34)$$

As such, each style is weakened due to  $w_k < 1$  in the stylized image and could even not be observed.

## 6 Double-style transfer results from AdaIN and Avatar-net

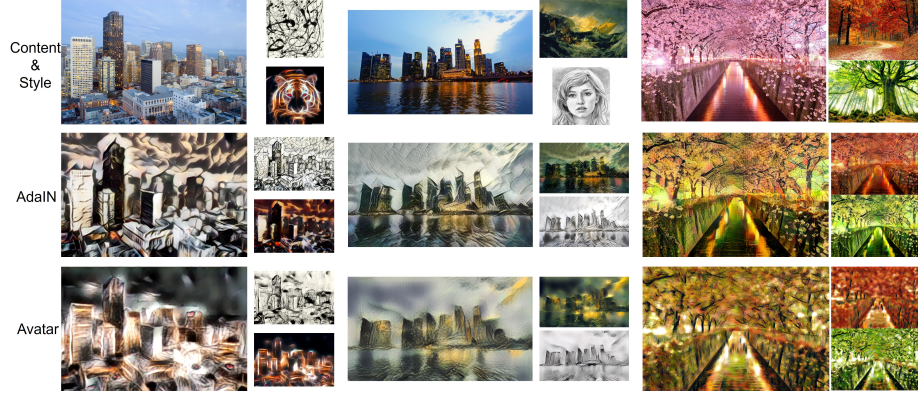

**Fig. 5:** Double-style transfer results from AdaIN and Avatar-net. Unlike our method that preserves the integrity of each style, styles in doubly stylized images from AdaIN and Avatar-net might be weakened due to the linear interpolation of feature maps.
